# Supplementary material for: Archaeal β-CASP ribonucleases of the aCPSF1 family are orthologs of the eukaryal CPSF-73 factor
Source: PubMed Central journal article supplement — Nucleic Acids Res. 2012 Dec 6;41(2):1091–103. doi: 10.1093/nar/gks1237 (PMC3553952; doi:10.1093/nar/gks1237), 2012-12-06
Supplement: supp_gks1237_nar-01706-r-2012-File009.pdf [file supp_gks1237_nar-01706-r-2012-File009.pdf]

## SUPPORTING INFORMATIONS

## SUPPLEMENTARY TABLE

Table S1: Primers used in this study

| <b>Primer</b>     | <b>Sequence</b>                                                          |
|-------------------|--------------------------------------------------------------------------|
| OLC5              | CCGCTCGAGAGTGCATTGATAAAAAGGGA                                            |
| OLC3              | CGCGGATCCTCACCTCAGCCTTATTGTG                                             |
| OLΔKHC5           | CATATGCTCGAGGCCAGAAAGCCCGAGTACAAG                                        |
| OLΔC3             | CGCGGATCCAGTTGAAAGCCCAAATTT                                              |
| OL1A261           | CACGCTCACTTGGATGCTAGCGGAATGTTACCA                                        |
| OL2A261           | TGGTAACATTCCGCTAGCATCCAAGTGAGCGTG                                        |
| OL1A594           | GATGGATTCTCTGGTGCTGCGGATAGGAGGGAA                                        |
| OL2A594           | TCCCTCCTATCCGCAGCACCCAGAGAATCCATC                                        |
| OLsR47<br>MutCG3  | AAGGTGAATCAGCACTCAGCAGATCCTCATCACTCCTCAGGACC                             |
| OLsR47<br>MutCG5  | CCGGAATTCTAATACGACTCACTATAGATGAAGATGATGAGCTCG<br>GCAGGTCCTGAGGAGTGATGAGG |
| OLsR47<br>Mut21U5 | CCGGAATTCTAATACGACTCACTATAGATGAAGATGATGAGCTCG<br>GTAGGTCCTGAGGAGTGATGAGG |
| OLsR47<br>Mut21U3 | AAGGTGAATCAGCACTCAAGATCCTCATCACTCCTCAGGACC                               |

## SUPPLEMENTARY FIGURE S1

A

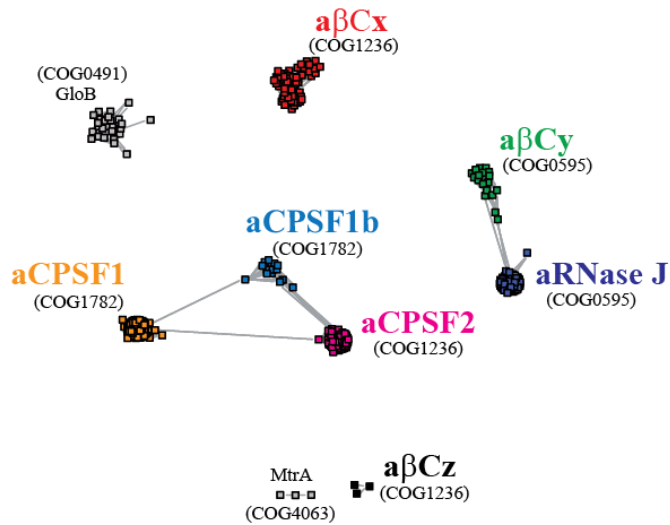

B

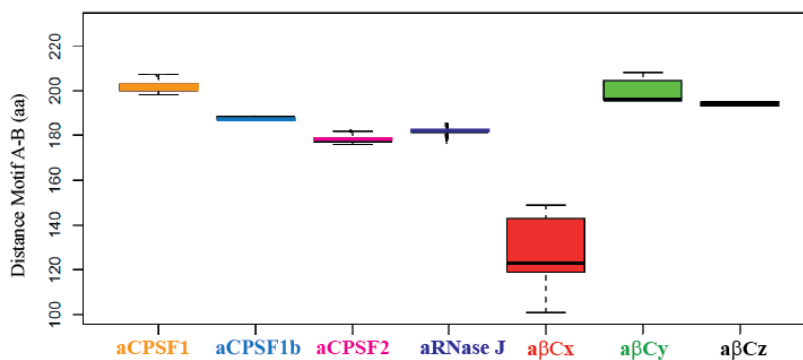**Figure S1**

(A) Graph of orthologous archaeal  $\beta$ -CASP proteins. The pairs of orthologous links between proteins were retrieved from our database and used to construct the graph with nodes corresponding to proteins (small colored squares) and edges to the orthologous links between proteins (grey lines). The nine clusters were named according to available functional information (aCPSF, aRNase J, GloB, MtrA), or as archaeal  $\beta$ -CASP families (a $\beta$ C[x:z]). The GloB (COG0491), MtrA (COG4063) clusters appeared to be false positives (see Methods) and were excluded from further analysis. The a $\beta$ Cy and a $\beta$ Cz clusters included highly divergent sequences, scattered in different taxonomic orders and therefore not monophyletic (B). Distribution of the length (in amino acid residues) of the  $\beta$ -CASP domains of the seven archaeal  $\beta$ -CASP clusters. The distance in amino acids between the A and B motifs were computed for each protein. The results were summarized as boxplots for each archaeal  $\beta$ -CASP cluster. The distance is in an interval of 160 to 210 amino acids for aCPSF1, aCPSF1b, aCPSF2, aRNase J,  $\alpha\beta$ Cy and  $\alpha\beta$ Cz (average  $202 \pm 3.3$ ,  $188 \pm 2.0$ ,  $178 \pm 3.2$  and  $181 \pm 1.3$ ,  $197 \pm 14.6$  and  $194 \pm 1.4$  respectively) except for the heterogeneous  $\alpha\beta$ Cx, which falls between 100 and 160 amino acids (average  $129 \pm 13.5$ ).

## SUPPLEMENTARY FIGURE S2

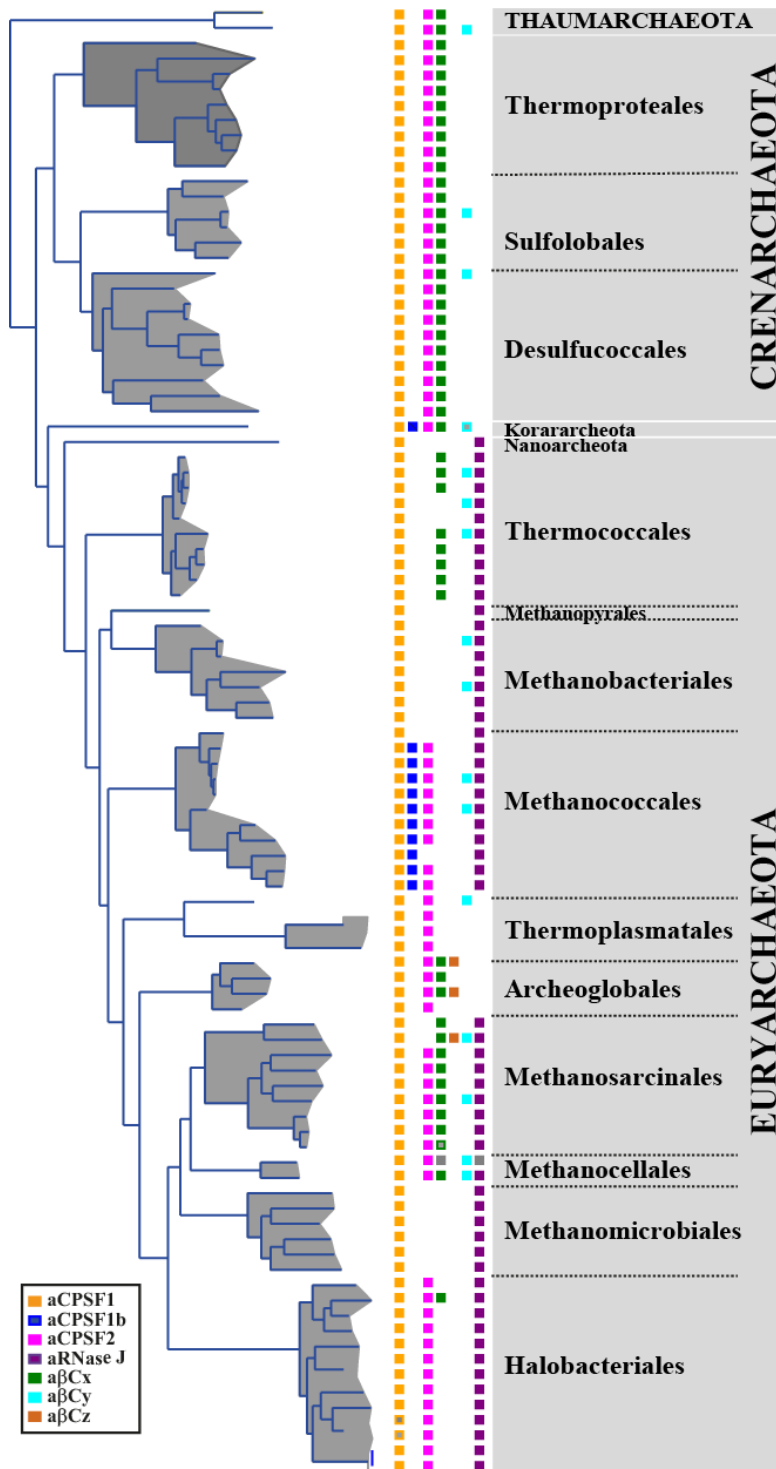

**Figure S2** Repartition of the seven β-CASP clusters in archaeal phylogeny. Cluster colors are as in **Fig. S1**

## SUPPLEMENTARY FIGURE S3

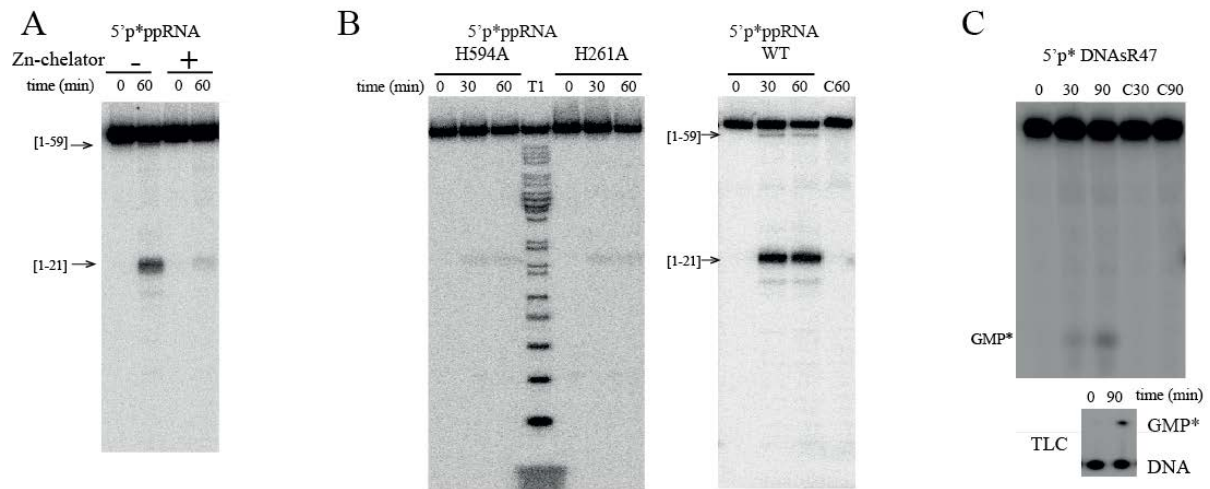

**Figure S3.** (A) Kinetic analysis of 5'p\*ppRNA sR47 cleavage in presence (+) or in absence (-) of 10 mM 1,10-phenanthroline, a strong Zn chelator. (B) *In vitro* activity of Pab-aCPSF1H261A (H261A) and Pab-aCPSF1H594 (H594) variants. Time course analysis of RNA cleavage on 5'p\*ppRNA substrate by protein variants (6  $\mu$ M) at 65°C as indicated. See legend to Fig. 2 and 3 for symbols. (C) Kinetic analysis of 5' end labeled DNA identical in sequence to sR47 RNA (5'p\*DNA sR47). The products were analyzed on 10% PAGE and by thin layer chromatography (TLC) (bottom).

## SUPPLEMENTARY FIGURE S4

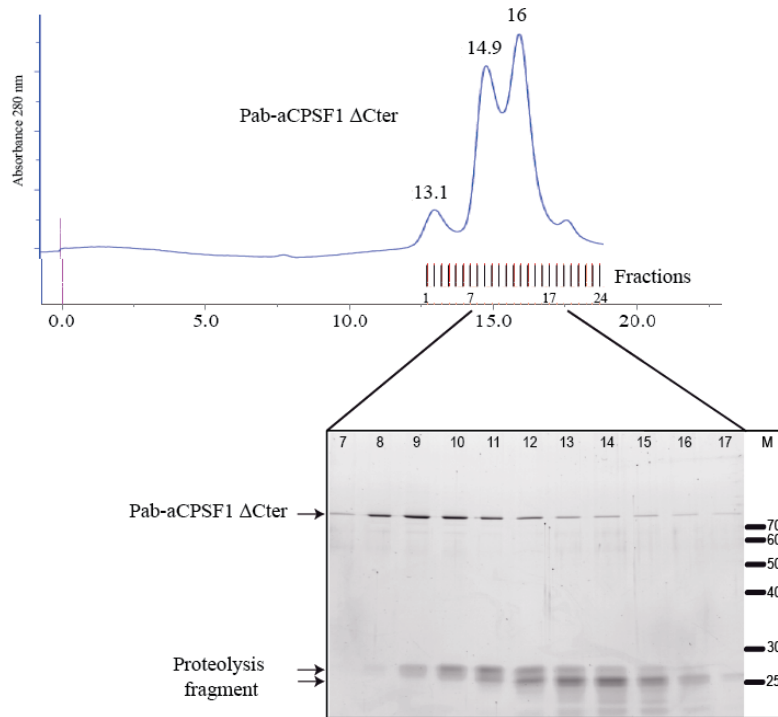

**Figure S4.** Identification of Pab- $\Delta$ Cter protein proteolysis products. Fractions (7 to 17) of the size exclusion chromatography were separated on a 12% SDS-PAGE and sypro-orange stained. (M) stands for the protein marker (Page ruler unstained protein ladder, Thermo Scientific). The three discrete species indicated by arrows were excised and then sequenced by mass spectrometry (LC-ESI-MS/MS). The peptide sequences of the upper band overlap the entire amino sequence of Pab-aCPSF1 $\Delta$ Cter whereas the two lower bands match exclusively the N-terminal KH domain.
